# Supplementary material for: Interfacing centrifugal microfluidics with linear-oriented 8-tube strips and multichannel pipettes for increased throughput of digital assays
Source: Royal Society of Chemistry journal article supplement (doi:10.1039/d3lc00339f), 2023-01-01
Supplement: d3lc00339f1.pdf [file d3lc00339f1.pdf]

## Electronic Supplementary Information

### Interfacing centrifugal microfluidics with linear-oriented 8-tube strips and multichannel pipettes for increased throughput of digital assays

Yu-Kai Lai<sup>ab</sup>, Yu-Ting Kao<sup>b</sup>, Jacob Hess<sup>ab</sup>, Silvia Calabrese<sup>a</sup>, Felix von Stetten<sup>ab</sup> and Nils Paust<sup>ab\*</sup>

#### S1: PCR buffer (1×) preparation

1 fold Supermix dilution in water was used for disperse phase for droplet size characterization. 2× ddPCR Supermix for probes (Bio-Rad Laboratories Inc., Hercules, CA, USA) was diluted to 1:1 (v/v) in distilled water (UltraPure DNase/RNase free, Invitrogen Corp., Carlsbad, CA, USA). Viscosity measurement was carried out by Physica MCR 101 rheometer (Anton Paar, Graz, Austria) at 20 °C. The measured viscosity is  $1.653 \pm 0.003$  mPa·s. The density was measured by weighing 1 ml of the buffer in lab tube. The value is  $\sim 1000$  kg/m<sup>3</sup>.

#### S2: Viscosity of emulsion flow

We noted that multiple factors (viscosity of disperse phase and continuous phase, number of droplet in the channel, droplet morphology, etc.) affect the viscosity of emulsion flow  $\eta_{eml}$ . Since we design identical fluidic condition as the work from Schulz et al. [1], we also expect that the  $\eta_{eml}$  derived from the reference work would cover other factors (e.g. capillary pressure at nozzle).  $\eta_{eml}$  was determined as follows: First, a series of solutions for  $\bar{Q}_{spl}$  in the proposed network simulation model (described in the manuscript) using geometry from previous work [1] were solved by sweeping potential  $\eta_{eml}$  from 2 to 18 mPa·s at intervals of 0.1 mPa·s. Secondly, the corresponding  $\eta_{eml}$  was interpolated with the measured  $\bar{Q}_{spl}$ . The result is shown in Fig. S2. A linear function was applied for an estimation of  $\eta_{eml}$  and therefore  $\eta_{eml}$  was obtained  $\sim 10.5$  mPa·s in the case  $\eta_{spl} = 1.65$  mPa·s.

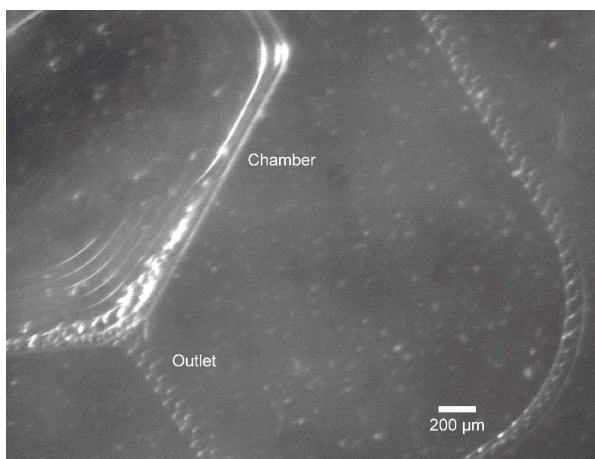

Figure S1 Squeezed droplet in the outlet channel.

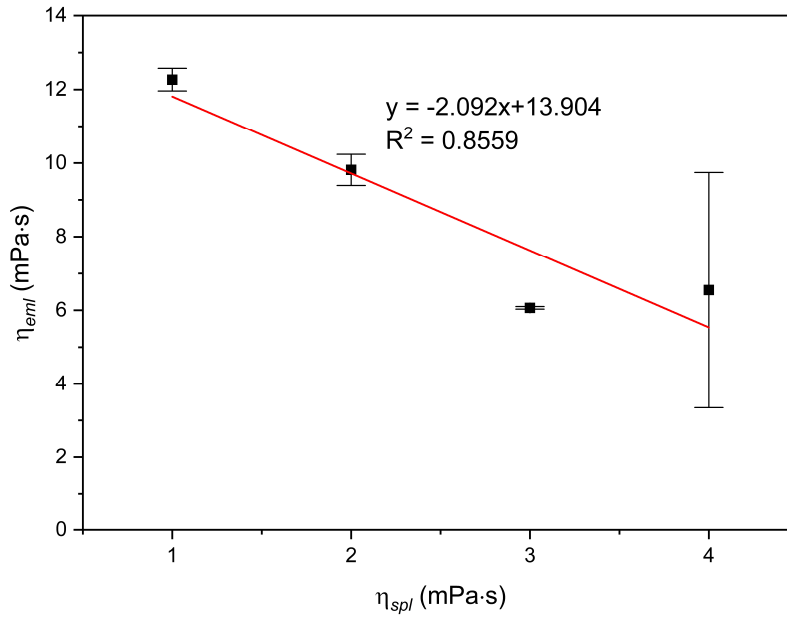

Figure S2 the fitting  $\eta_{eml}$  as a function of  $\eta_{spl}$ .

### S3: Design geometry:

Table S1 List of geometry and material parameters used in the microfluidic design.

| Abbreviation | Description                       | Value                                    |
|--------------|-----------------------------------|------------------------------------------|
| $d_{oil}$    | Depth oil supply channel          | 37 $\mu\text{m}$                         |
| $w_{oil}$    | Width oil supply channel          | 49 $\mu\text{m}$                         |
| $L_{oil}$    | Length oil supply channel         | Varies on DGU case                       |
| $\rho_{oil}$ | Density fluorinated oil           | 1614 $\text{Kg}\cdot\text{m}^{-3}$       |
| $\eta_{oil}$ | Dynamic viscosity fluorinated oil | 1.24 mPa·s                               |
| $d_{spl}$    | Depth sample supply channel       | 58 $\mu\text{m}$                         |
| $w_{spl}$    | Width sample supply channel       | 62 $\mu\text{m}$                         |
| $L_{spl}$    | Length sample supply channel      | Varies on DGU case                       |
| $\rho_{spl}$ | Density sample                    | $\sim 1000 \text{ Kg}\cdot\text{m}^{-3}$ |
| $\eta_{spl}$ | Dynamic viscosity sample          | 1.653 $\pm 0.003$ mPa·s                  |
| $d_{nzl}$    | Depth nozzle                      | 25 $\mu\text{m}$                         |
| $w_{onzl}$   | Width nozzle                      | 40 $\mu\text{m}$                         |
| $L_{nzl}$    | Length nozzle                     | 500 $\mu\text{m}$                        |
| $d_{out}$    | Depth outlet channel              | 100 $\mu\text{m}$                        |
| $w_{out}$    | Width outlet channel              | 100 $\mu\text{m}$                        |
| $L_{out}$    | Length outlet channel             | Varies on DGU case                       |

Table S2 List of outlet channel length (unit: mm)

| Abbreviation | DGU1  | DGU2  | DGU3  | DGU4  | DGU5  | DGU6  | DGU7  | DGU8  |
|--------------|-------|-------|-------|-------|-------|-------|-------|-------|
| $L_{out}$    | 13.53 | 13.41 | 13.59 | 13.66 | 13.91 | 14.13 | 14.35 | 14.35 |

#### S4: Geometry verification after manufacturing

The key feature for step emulsification are the nozzle dimensions. Hence, we checked the nozzle dimension after CNC milling of the PMMA substrate. The nozzles were measured by confocal microscopy (DUO Vario, Confovis GmbH, Jena, Germany). Here, we averaged the dimension of 8 nozzles from corresponding DGU for each DGU case.

**Table S3** Measured nozzle dimensions by profilometer. (unit:  $\mu\text{m}$ )

| Abbreviation | DGU1            | DGU2            | DGU3            | DGU4            | DGU5            | DGU6            | DGU7            | DGU8            |
|--------------|-----------------|-----------------|-----------------|-----------------|-----------------|-----------------|-----------------|-----------------|
| $d_{nzt}$    | $24.6 \pm 0.38$ | $24.6 \pm 0.19$ | $24.7 \pm 0.24$ | $25.4 \pm 0.13$ | $26.0 \pm 0.18$ | $26.2 \pm 0.19$ | $26.3 \pm 0.21$ | $24.6 \pm 0.22$ |
| $w_{nzt}$    | $43.7 \pm 0.90$ | $43.0 \pm 0.59$ | $42.9 \pm 0.84$ | $42.3 \pm 1.23$ | $42.7 \pm 0.49$ | $42.6 \pm 0.92$ | $43.2 \pm 0.64$ | $42.4 \pm 1.05$ |

The channel dimensions were also measured. The measured dimensions are listed below:

**Table S4** Measured channel dimensions by profilometer. (unit:  $\mu\text{m}$ )

| Abbreviation | DGU1  | DGU2  | DGU3 | DGU4  | DGU5  | DGU6 | DGU7 | DGU8 |
|--------------|-------|-------|------|-------|-------|------|------|------|
| $d_{oil}$    | 36.3  | 36.4  | 35.7 | 35.9  | 36.3  | 35.9 | 36.1 | 35.6 |
| $w_{oil}$    | 52.7  | 53.3  | 52.0 | 55.1  | 53.3  | 51.2 | 52.4 | 53.1 |
| $d_{spl}$    | 61.1  | 61.4  | 61.6 | 61.5  | 60.7  | 60.3 | 61.8 | 59.8 |
| $w_{spl}$    | 63.6  | 63.0  | 64.5 | 61.9  | 62.4  | 64.5 | 64.9 | 61.8 |
| $d_{out}$    | 96.7  | 97.2  | 96.6 | 97.3  | 96.9  | 96.1 | 96.0 | 96.0 |
| $w_{out}$    | 100.8 | 102.1 | 97.5 | 105.2 | 105.4 | 99.4 | 99.0 | 99.9 |

### S5: Description of the droplet diameter evaluation in MATLAB

Stitched bright field images were acquired by the microscope Observer Z1 (Zeiss GmbH, Germany), followed by circle recognition based on build-in Hough algorithm in MATLAB. As shown in the Fig. S3, the droplets are detected and outlines are marked in the image (see Fig. S3 b). Diameter profile of 2000 droplets were extracted for further plotting in Origin Pro 9 (OriginLab Corporation, USA).

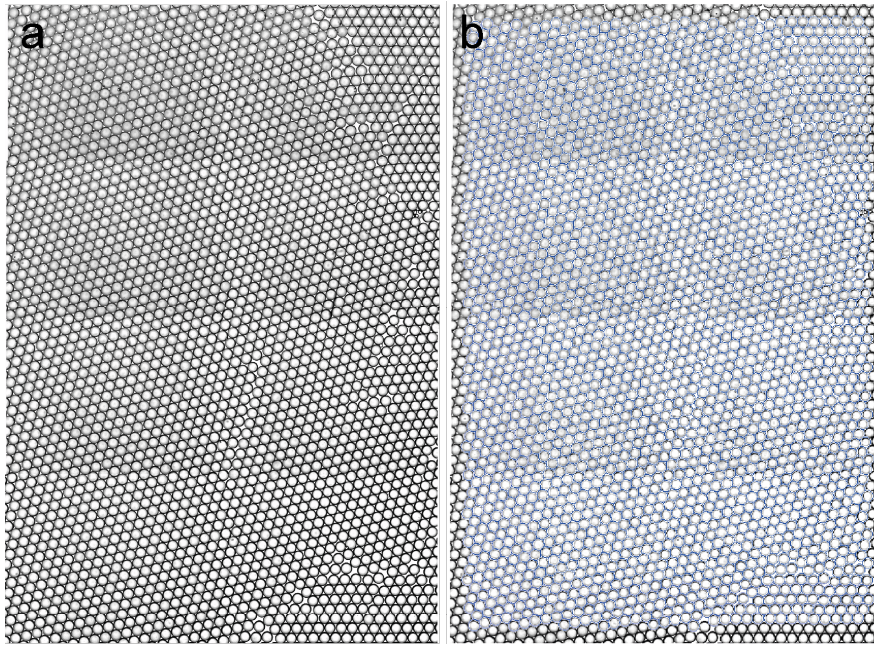

**Figure S3** Circle recognition done by customized MATLAB script.



### S6: ddPCR result from individual DGU

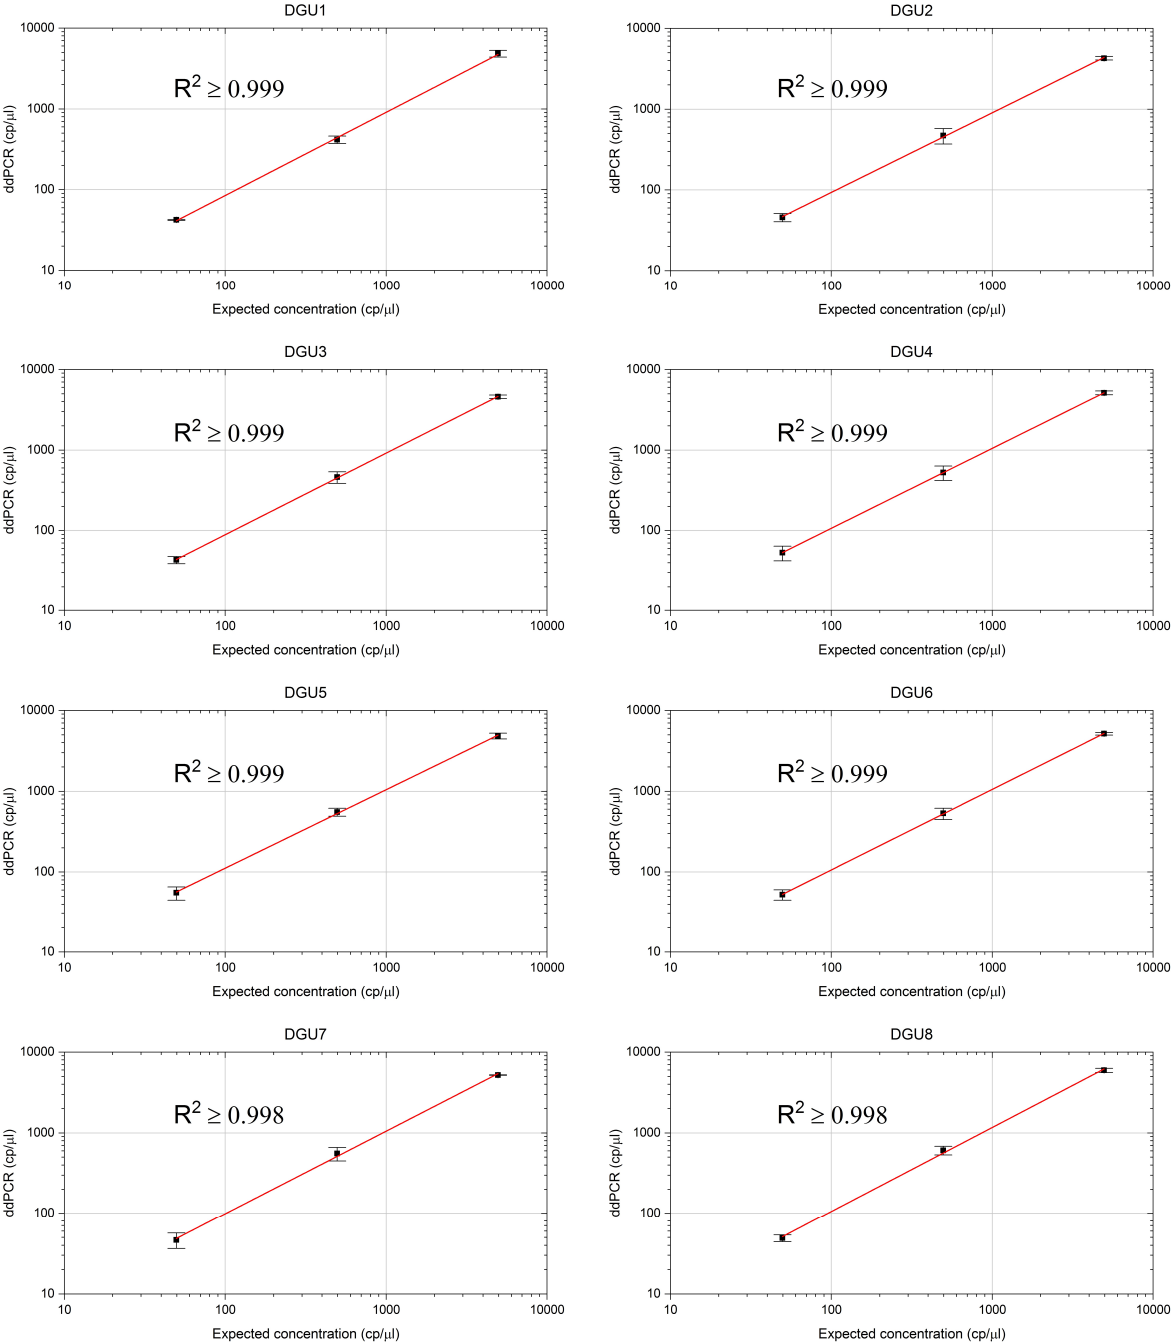

Figure S4 Result of ddPCR from each DGU case. Red lines mark linear regression.

## Reference:

1. Martin Schulz, Sophia Probst, Silvia Calabrese, Ana R. Homann, Nadine Borst, Marian Weiss, Felix Von Stetten, Roland Zengerle and Nils Paust, Versatile Tool for Droplet Generation in Standard Reaction Tubes by Centrifugal Step Emulsification, *Molecules*, 2020, **25**, 1914.
